# Supplementary material
Source: MDPI journal article supplement (https://www.mdpi.com/2313-0105/8/12/262)
Supplement: s1 [file s1]

## Supporting information

# Tuning the architecture of hierarchical porous $\text{CoNiO}_2$ nanosheet for enhanced performance of Li-S batteries

Lili Chai, Huizi Ye, Zhengguang Hu, Fengliang Liu, Liyun Qing, Zhiqi Zhang, Xianxin Lai, Yong Zhao\* and Li Wang\*

School of Physics and Materials Science, Department of Physics, Nanchang University, Nanchang 330031, People's Republic of China

\* Correspondence: [zhaoyong@ncu.edu.cn](mailto:zhaoyong@ncu.edu.cn)(Y.Z.); [liwang@ncu.edu.cn](mailto:liwang@ncu.edu.cn)(L.W.);

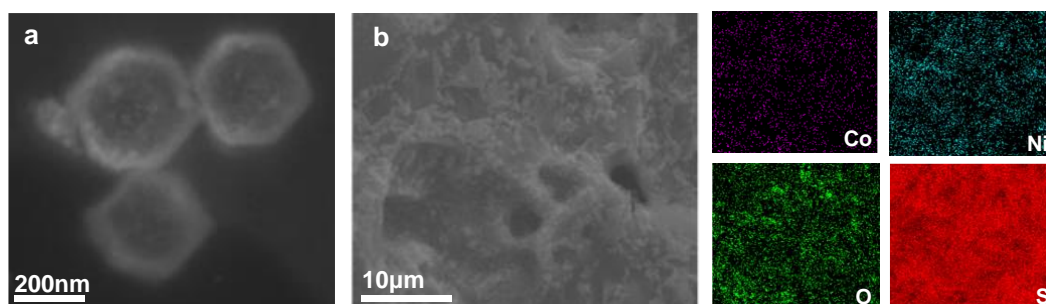

**Figure S1.** (a) The SEM image of S/CoNiO<sub>2</sub>(B). (b) EDS elemental mapping of S/CoNiO<sub>2</sub>(B).

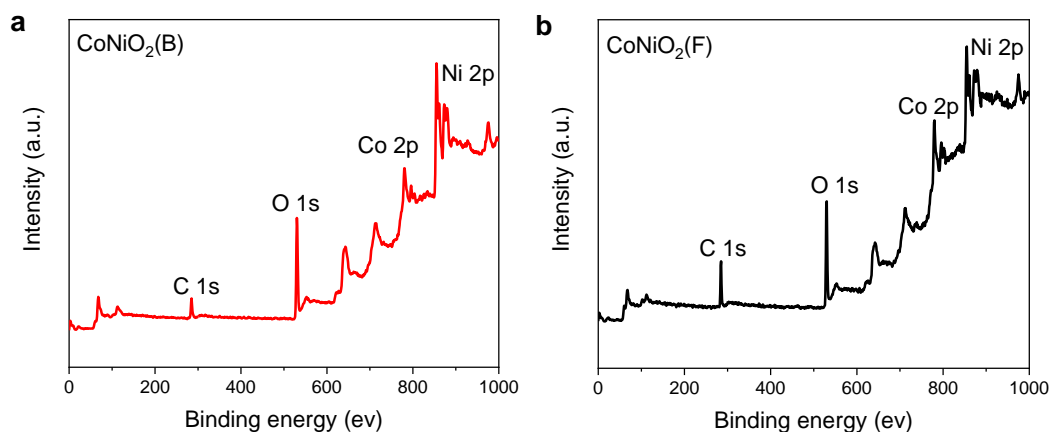

**Figure S2.** The XPS survey spectrum of (a) CoNiO<sub>2</sub>(B) and (b) CoNiO<sub>2</sub>(F).

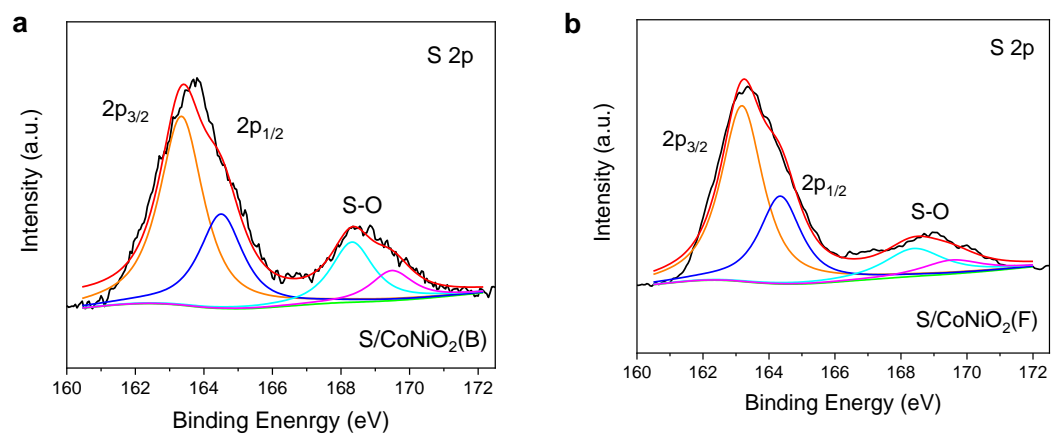

**Figure S3.** S 2p XPS spectra of (a) S/CoNiO<sub>2</sub>(B) and (b) S/CoNiO<sub>2</sub>(F).
